# Supplementary material
Source: PubMed Central journal article supplement (PMC4399059)
Supplement: IAI.00048-15_zii999091186so1.pdf [file IAI.00048-15_zii999091186so1.pdf]

1 **Supplementary Figure S1**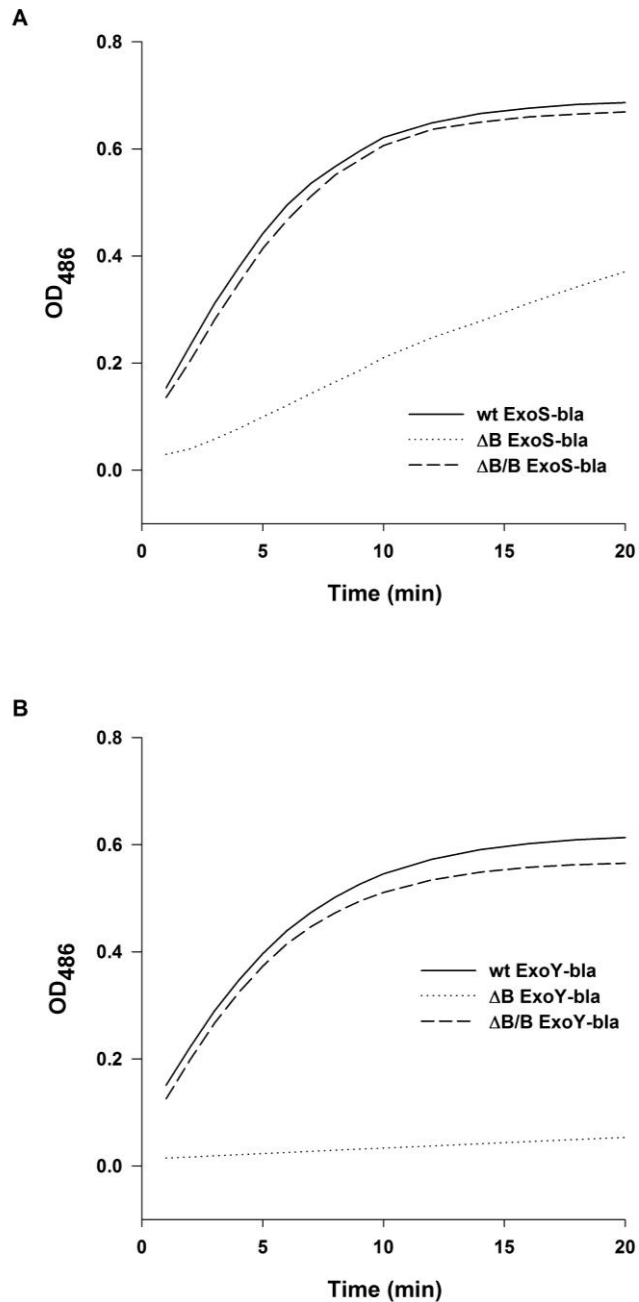

2

3 **Supplementary Fig S1: Quantification of secreted  $\beta$ -lactamase chimeric Exotoxins.**

4 Wild-type (wt),  $\Delta exsB$  ( $\Delta B$ ) and  $\Delta exsB/exsB$  ( $\Delta B/B$ ) strains harboring plasmids enabling the production of  
 5 ExoS (A) or ExoY (B) toxins fused to the  $\beta$ -lactamase (Verove *et al*, 2012) were grown to OD=1 under  
 6 T3SS induction conditions (calcium depletion). Supernatants were then incubated with nitrocefin, a  
 7 substrate of  $\beta$ -lactamase. Nitrocefin hydrolysis by the chimeric exotoxins was monitored during 20 min by  
 8 measuring the absorbance at 486nm.

1 **Supplementary Figure S2**

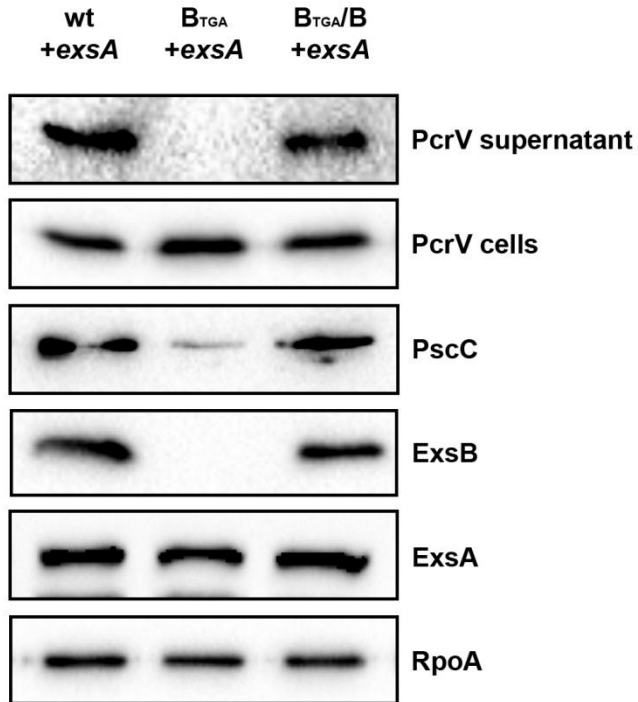

2  
3 **Supplementary Fig S2: Impaired T3SS secretion in the ExsB-TGA mutant overproducing ExsA.**  
4 The T3SS proteins PcrV, PscC, ExsB and ExsA were monitored by western blot in bacterial extracts. In  
5 addition, secreted PcrV was detected in culture supernatants. The wild-type strain (wt), the mutant  
6 harboring the *exsB* gene disrupted by a TGA stop-codon (B<sub>TGA</sub>) and the complemented strain (B<sub>TGA</sub>/B)  
7 were transformed with the pDD2 plasmid (+*exsA*). All these strains moderately overproduce the T3SS  
8 activator ExsA to the same level, as detected by western blot. RpoA was used as a loading control.

1 **Supplementary Figure S3**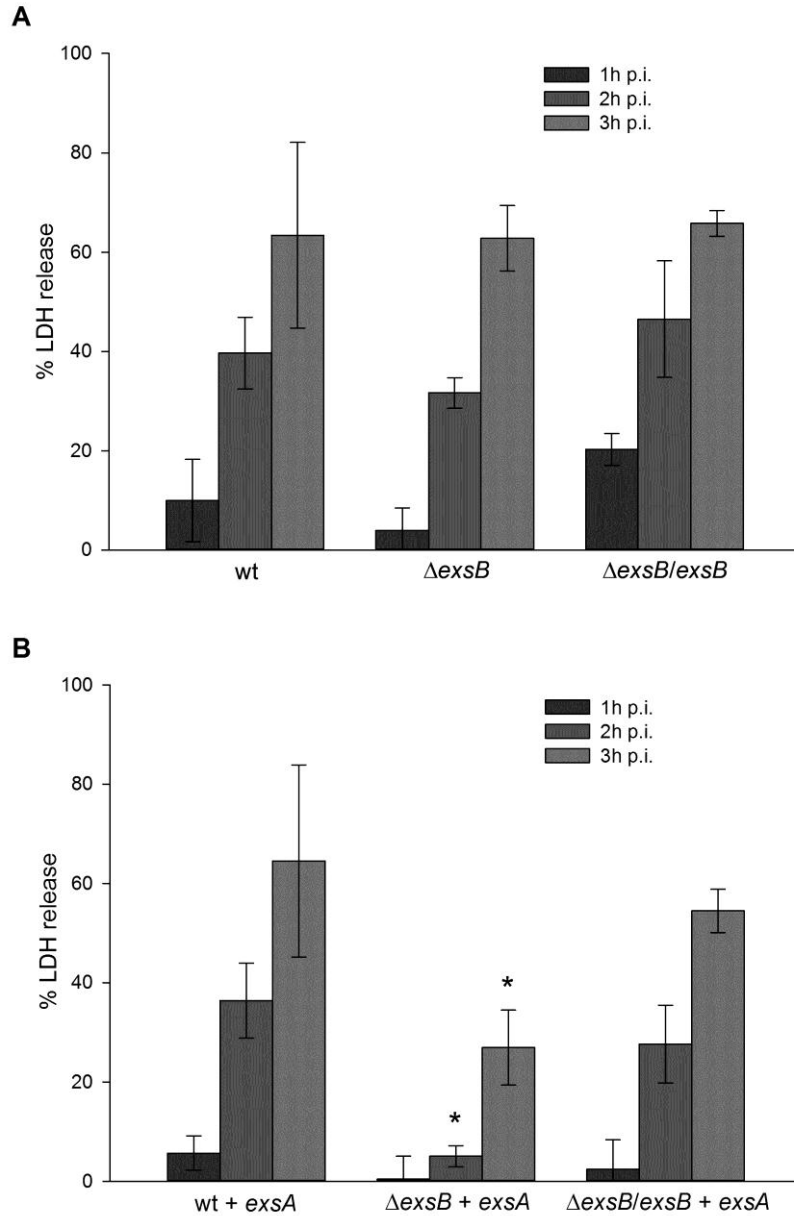

2

3 **Supplementary Fig 3: Cytotoxicity assay on J774 mouse macrophages.**

4 The percentage of intracellular lactate dehydrogenase (LDH) release by the infected cells was measured  
 5 at 1, 2 and 3 hours post-infection at a MOI of 1. The cytotoxicity assay was first performed with the wild-  
 6 type (wt), mutant lacking *exsB* ( $\Delta exsB$ ) and complemented ( $\Delta exsB/exsB$ ) strains of *P. aeruginosa* (A). In  
 7 these conditions, no difference was observed between all the strains. The assay was then performed with  
 8 the same strains overproducing the T3SS activator ExsA (B). One-way ANOVA was performed (overall *P*  
 9 value < 0.02). The stars indicate a statistically significant difference of cytotoxicity caused by  $\Delta exsB$ +*exsA*  
 10 compared to wt+*exsA* and  $\Delta exsB/exsB$ +*exsA* at 2h and 3h post-infection (Tukey post-hoc test *p* < 0.05)

1 **Supplementary Figure S4**

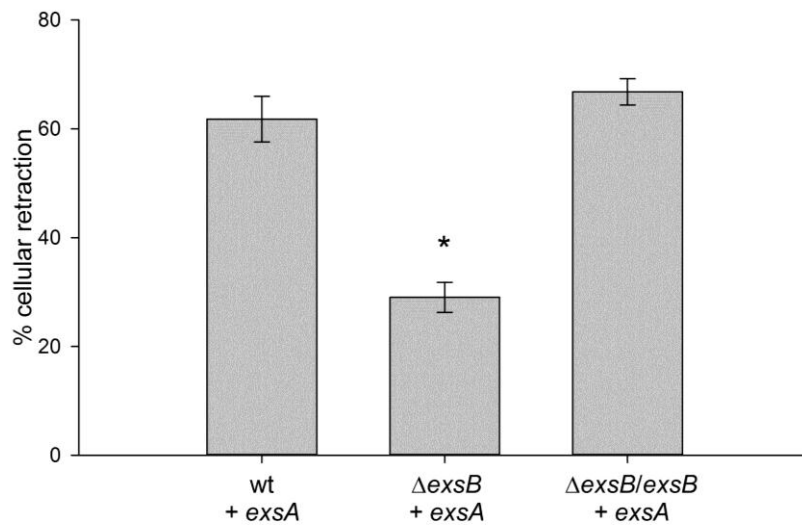

2

3

4 **Supplementary Fig 4: Cytotoxicity assay on HUVEC with ExsA overproducing strains.**

5 The percentage of cellular retraction was measured after 3 hours of infection by the wild-type (wt), mutant  
6 ( $\Delta exsB$ ) and complemented ( $\Delta exsB/exsB$ ) strains overproducing ExsA from the pDD2 plasmid. One-way  
7 ANOVA was performed (overall P value = 0.001). The star indicates a statistically significant difference of  
8 cytotoxicity caused by  $\Delta exsB$  compared to wt and  $\Delta exsB/exsB$  (Tukey post-hoc test  $p < 0.001$ ).
